# Supplementary material for: Targeting positive feedback between BASP1 and EGFR as a therapeutic strategy for lung cancer progression
Source: PubMed Central journal article supplement (PMC7532684; doi:10.7150/thno.49425), 2020-08-29
Supplement: thnov10p10925s1.pdf [file thnov10p10925s1.pdf]

## **Supplemental Information**

### **Targeting positive feedback between BASP1 and EGFR as a therapeutic strategy for lung cancer progression**

Ching-Chan Lin, Yu-Kai Huang, Chia-Fong Cho, Yu-Sen Lin, Chia-Chien Lo, Ting-Ting Kuo, Guan-Chin Tseng, Wei-Chung Cheng, Wei-Chao Chang, Tzu-Hung Hsiao, Liang-Chuan Lai, Jin-Yuan Shih, Yu-Huei Liu, K.S. Clifford Chao, Jennifer L. Hsu, Pei-Chih Lee, Xian Sun, Mien-Chie Hung, Yuh-Pyng Sher

#### **Includes:**

1. Supplementary Methods
2. Supplementary References
3. Supplementary Figures

## **Supplementary Methods**

### **Time-lapse Migration and Colony Formation Assay**

Time-lapse migration assay was conducted as previously described [1]. Briefly, the migration distance of cells on collagen-coated dishes in serum-free media was traced using CCD video cameras (AxioCam MRm, Zeiss, Jena, Germany) and Track Point function of Image J software (NIH, Bethesda, MD, USA). Colony formation assay was performed as previously described [2]. The percentage of plating efficiency was calculated by dividing the number of colonies formed by the number of cells seeded and multiplied by 100.

### **IPTG-inducible shRNA System**

To generate IPTG-inducible shBASP1 expression cell lines, the region of BASP1 targeted by shRNA was inserted into the pLAS1w.3xLacO vector. IPTG (500  $\mu$ M) was used to induce the expression of shBASP1. BASP1 levels were detected by immunoblotting with BASP1 antibody.

### **Real-time PCR**

Total RNA was extracted from tissues or cells with TRIzol (Invitrogen) and reverse

transcription performed with oligo dT primers according to the manufacturer's instructions. Real-time PCR was carried out in the LightCycler® 96 Real-Time PCR System with Universal Probe Library (Roche Diagnostics). Primers (5' to 3'):

Human BASP1 forward: TGGATCTCAATGCCAATCCT

Human BASP1 reverse: GAGAATGTTTGTCACTCCCAAAA;

EGFR forward: GCCTTGACTGAGGACAGCA

EGFR reverse: TTTGGGAACGGACTGGTTTA;

Relative levels of human BASP1 and EGFR gene expression were determined using human GAPDH as the endogenous control. All reactions were carried out in triplicate.

### **Immunoprecipitation**

Immunoprecipitation was performed as previously described [3]. Briefly, 500 µg cell lysates were mixed with 1 µg antibody for each reaction. The mixture was rotated at 4 °C overnight followed by the addition of 50 µL of protein A/G sepharose slurry. After rotation for another 4 h, beads were collected and washed twice with PBS containing 1% NP-40. Immunoprecipitates were resolved by SDS-PAGE followed by Western blotting with the indicated antibodies.

### **3-(4,5-dimethylthiazol-2-yl)-2,5-diphenyltetrazolium bromide (MTT) assay**

MTT assays were conducted as previously described to measure cell proliferation [1]. Briefly, cells were incubated with 100  $\mu$ L of MTT reagent (0.5 mg/mL) in 96-well plates for 4 h. The solubilized formazan was quantified at 570 nm using a spectrophotometer.

### **Immunofluorescence and *in situ* proximity ligation assay (PLA)**

Lung cancer cells were fixed with 4% paraformaldehyde for 30 min and stained with primary antibody against BASP1 (ab103315; Abcam) or EGFR (MA5-13070; Thermo Fisher Scientific) overnight followed by incubation with FITC-conjugated mouse IgG conjugated or rhodamine-conjugated rabbit IgG secondary antibody for 1 hour. The slides were covered with DAPI (4',6-diamidino-2-phenylindole) mounting medium (DUO82040; Sigma-Aldrich) and visualized using a fluorescent microscope with DAPI/FITC/rhodamine triple-pass filters. PLA was performed using the Duolink *in situ*-Fluorescence (Sigma-Aldrich) according to the manufacturer's instructions.

### **Lipid raft isolation**

Lipid raft membrane fractions were isolated using Triton X-100 extraction method or OptiPrep density gradient centrifugation assay as previously reported with modifications [4, 5]. Briefly, for Triton X-100 extraction method, cells were collected with TNE buffer (20 mM Tris-HCl, 150 mM NaCl, 2 mM EDTA, pH 7.4, and 2 mM sodium orthovanadate with protease inhibitors) and subjected to sonication. After centrifugation at 12,000 rpm for 20 min at 4°C, supernatants were collected as cytosolic fractions. Pellets were solubilized in TNE buffer with 1% Triton X-100 and centrifugation. The soluble fractions in the supernatant were collected and pellets were lysed with TNE buffer with 1% SDS and collected as insoluble fractions. For OptiPrep density gradient centrifugation assay, cells were collected with homogenization buffer (150 mM NaCl, 20 mM Na<sub>2</sub>HPO<sub>4</sub>, 2 mM NaH<sub>2</sub>PO<sub>4</sub>, 20% v/v glycerol, and 2 mM sodium orthovanadate with protease inhibitors, pH 7.4) and subjected to sonication. After centrifugation at 12,000 rpm for 20 min at 4°C, the supernatants were subjected to centrifugation at 32,000 rpm (Beckman-Coulter Optima L-90K ultracentrifuge with a SW90Ti rotor) for 90 min to collect the total plasma membrane. The pellets were solubilized in TNE buffer (20 mM Tris-HCl, 150 mM NaCl, 2mM EDTA, pH 7.4, and 2 mM sodium orthovanadate with protease inhibitors) containing 1% Triton X-100 and adjusted to a 40% final density by using OptiPrep density gradient medium (AXS-

1114542; Alere Technologies AS, Oslo, Norway). Samples were overlaid with a discontinuous 30%/5% OptiPrep density gradient and centrifuged at 38,000 rpm for 16 h at 4°C (SW41Ti rotor). Fractions were gently removed from the top of the gradient in 1-mL fractions. All fractions were then separated by SDS-PAGE and analyzed by Western blotting.

### **Intracellular calcium signaling**

Intracellular calcium concentration was measured by imaging the fluorescence of the Ca<sup>2+</sup> indicator dye, fluo-4 (Fluo-4 NW Assay Kit, #F36205; Thermo Fisher Scientific). Briefly, cells were grown overnight in 96-well black clear flat bottom polystyrene plates (Costar) at 37 °C with 5% CO<sub>2</sub>. The growth medium was removed, and the cells were incubated with 100 µl dye-loading solution (4 µM fluo-4/AM) at 37 °C with 5% CO<sub>2</sub> incubator for 30 min and then at room temperature for another 30 min. After loading, cells were washed with PBS and fluorescence detection performed at room temperature.

### **Bioinformatics analysis**

For correlation analysis between BASP1 and activation of EGFR signaling in

clinical lung cancer specimens, the expression profiling of lung adenocarcinoma samples (n = 505) and normal samples (n = 19) was downloaded from the Cancer Genome Atlas (TCGA). EGFR-upregulated signaling gene set (n = 18) was compiled from Ma et al. [6] and Amit et al. [7]; EGFR-downregulated signaling gene set (n = 25) was compiled from Amit et al. [7]. The samples were divided into two groups: upregulated EGFR signaling (n = 236) and downregulated EGFR signaling (n = 53) based on the following criteria: 1) upregulated EGFR signaling (n = 412) included samples with an average expression value of EGFR-upregulated signaling gene set of 1.5 times greater than that of all normal samples; 2) downregulated EGFR signaling (n = 229) included samples with an average expression value of EGFR-downregulated signaling gene set of 1.5 times less than that of all normal samples; 3) Samples (n = 176) that met both criteria were excluded for further analysis. The ratio of cancerous to normal *BASP1* was calculated in EGFR signaling up-regulated and down-regulated groups.

Conversely, tumor tissues with *BASP1* expression lower than the mean of normal samples were belong to '*BASP1* low group' (n=116) and those with *BASP1* expression higher than the mean of normal samples were divided into '*BASP1* high group' (n=389). The EGFR signaling gene set (n=43) was composed of both EGFR upregulated

signaling gene set. The average ratio of EGFR signaling gene in cancerous to normal tissues was calculated in BASP1-low and -high groups.



## Key resources table

| Antibodies                     |                           |                                     |
|--------------------------------|---------------------------|-------------------------------------|
| BASP1 (for WB)                 | Abcam                     | Cat# ab103315,<br>RRID:AB_10710130  |
| BASP1 (for IHC)                | Sigma                     | Cat# HPA045218<br>RRID: AB_2679263  |
| BASP1 (for Immunofluorescence) | Abcam                     | Cat#ab101855<br>RRID: AB_10711377   |
| EGFR (for IHC)                 | Abcam                     | Cat# ab52894<br>RRID: AB_869579     |
| EGFR (for Immunofluorescence)  | Thermo Fisher Scientific  | Cat# MA5-13319<br>RRID: AB_10985841 |
| EGFR (for Immunofluorescence)  | Santa Cruz                | Cat# sc-03<br>RRID: AB_631420       |
| EF1 $\alpha$                   | Millipore                 | Cat# 05-235,<br>RRID:AB_309663      |
| EGFR                           | Santa Cruz Biotechnology  | Cat# sc-03,<br>RRID:AB_631420       |
| phospho-EGFR (Tyr1068)         | Cell Signaling Technology | Cat# 3777,<br>RRID:AB_2096270       |
| ERK                            | Cell Signaling Technology | Cat# 9102,<br>RRID:AB_330744        |
| phospho-ERK                    | Cell Signaling Technology | Cat# 9101,<br>RRID:AB_331646        |
| GFP                            | Santa Cruz Biotechnology  | Cat# sc-9996,<br>RRID:AB_627695     |
| AKT                            | Cell Signaling Technology | Cat# 2920,<br>RRID:AB_1147620       |
| phospho-AKT (Thr308)           | Cell Signaling Technology | Cat# 9275,<br>RRID:AB_329828        |
| phospho-AKT (Ser473)           | Cell Signaling Technology | Cat# 9271,<br>RRID:AB_329825        |
| ubiquitin                      | Santa Cruz Biotechnology  | Cat# sc-8017,<br>RRID:AB_628423     |
| HA tag                         | Abcam                     | Cat# ab16918,<br>RRID:AB_302562     |
| Caveolin-1                     | Cell Signaling Technology | Cat# 3267<br>RRID: AB_2275453       |
| $\beta$ -actin                 | Abcam                     | Cat# ab8226,<br>RRID:AB_306371      |
| CBL                            | Santa Cruz Biotechnology  | Cat# sc-170,<br>RRID:AB_2259627     |
| transferrin receptor           | Thermo Fisher Scientific  | Cat# 13-6800,<br>RRID:AB_2533029    |
| Biological Samples             |                           |                                     |

|                                                                   |                                                                    |                             |
|-------------------------------------------------------------------|--------------------------------------------------------------------|-----------------------------|
| Human lung samples                                                | US Biomax                                                          | LC10012                     |
| Human lung samples                                                | US Biomax                                                          | LC10013                     |
| Human lung samples and brain metastasis samples                   | China Medical University Hospital tissue biobank, Taichung, Taiwan | NA                          |
| <b>Chemicals, Peptides, and Recombinant Proteins</b>              |                                                                    |                             |
| EGF                                                               | Sigma-Aldrich                                                      | Cat# E9644                  |
| Arsenic trioxide                                                  | TTY Biopharm Company                                               | NA                          |
| OptiPrep density gradient medium                                  | Alere Technologies AS, Oslo, Norway                                | Cat# AXS-1114542            |
| IPTG                                                              | Sigma-Aldrich                                                      | Cat# I6758                  |
| Cycloheximide                                                     | Sigma-Aldrich                                                      | Cat# C7698                  |
| Chloroquine diphosphate salt                                      | Sigma-Aldrich                                                      | Cat# C6628                  |
| MG132                                                             | Sigma-Aldrich                                                      | Cat# C2211                  |
| Erlotinib                                                         | Sigma-Aldrich                                                      | Cat# SML2156                |
| Afatinib ( <i>in vitro</i> )                                      | Selleckchem                                                        | Cat# S1011                  |
| Afatinib ( <i>in vivo</i> )                                       | Abmole                                                             | Cat# M5307                  |
| Osimertinib (AZD9291)                                             | MedChemExpress                                                     | Cat# HY-15772               |
| Cetuximab                                                         | Merck                                                              |                             |
| <b>Critical Commercial Assays</b>                                 |                                                                    |                             |
| fluo-4 (Fluo-4 NW Assay Kit;)                                     | Thermo Fisher Scientific                                           | Cat# F36205                 |
| Duolink In Situ Red Starter Kit Mouse/Rabbit (Immunofluorescence) | Sigma-Aldrich                                                      | Cat# DUO92101               |
| Human RTK Phosphorylation Antibody Array -Membrane                | Abcam                                                              | Cat# ab193662               |
| <b>Recombinant DNA</b>                                            |                                                                    |                             |
| BASP1 plasmid RC201815                                            | OriGene                                                            | CAT#: RC201815              |
| Lentiviral shRNA targeting BASP1 (clone E2)                       | National RNAi Core Facility, Taiwan                                | clone E2:<br>TRCN0000281253 |
| Lentiviral shRNA targeting BASP1(clone H1)                        | National RNAi Core Facility, Taiwan                                | clone H1:<br>TRCN0000149347 |
| Lentiviral shRNA targeting C-CBL (clone TRCN0000039727)           | National RNAi Core Facility, Taiwan                                | clone TRCN0000039727        |

|                      |                                     |              |
|----------------------|-------------------------------------|--------------|
| pLAS1w.3xLacO vector | National RNAi Core Facility, Taiwan | Cat# C6-7-18 |
|----------------------|-------------------------------------|--------------|

### Supplementary References

1. Lin CY, Chen HJ, Huang CC, Lai LC, Lu TP, Tseng GC, et al. ADAM9 promotes lung cancer metastases to brain by a plasminogen activator-based pathway. *Cancer Res.* 2014; 74: 5229-43.
2. Franken NA, Rodermond HM, Stap J, Haveman J, van Bree C. Clonogenic assay of cells in vitro. *Nat Protoc.* 2006; 1: 2315-9.
3. Huang TH, Huo L, Wang YN, Xia W, Wei Y, Chang SS, et al. Epidermal growth factor receptor potentiates MCM7-mediated DNA replication through tyrosine phosphorylation of Lyn kinase in human cancers. *Cancer cell.* 2013; 23: 796-810.
4. Taghibiglou C, Bradley CA, Gaertner T, Li Y, Wang Y, Wang YT. Mechanisms involved in cholesterol-induced neuronal insulin resistance. *Neuropharmacology.* 2009; 57: 268-76.
5. Chen PK, Chang BI, Kuo CH, Chen PS, Cho CF, Chang CF, et al. Thrombomodulin functions as a plasminogen receptor to modulate angiogenesis. *FASEB J.* 2013; 27: 4520-31.
6. Ma Y, Croxton R, Moorer RL, Cress WD. Identification of novel E2F1-regulated genes by microarray. *Arch Biochem Biophys.* 2002; 399: 212-24.
7. Amit I, Citri A, Shay T, Lu Y, Katz M, Zhang F, et al. A module of negative feedback regulators defines growth factor signaling. *Nat Genet.* 2007; 39: 503.

## Supplementary Figures

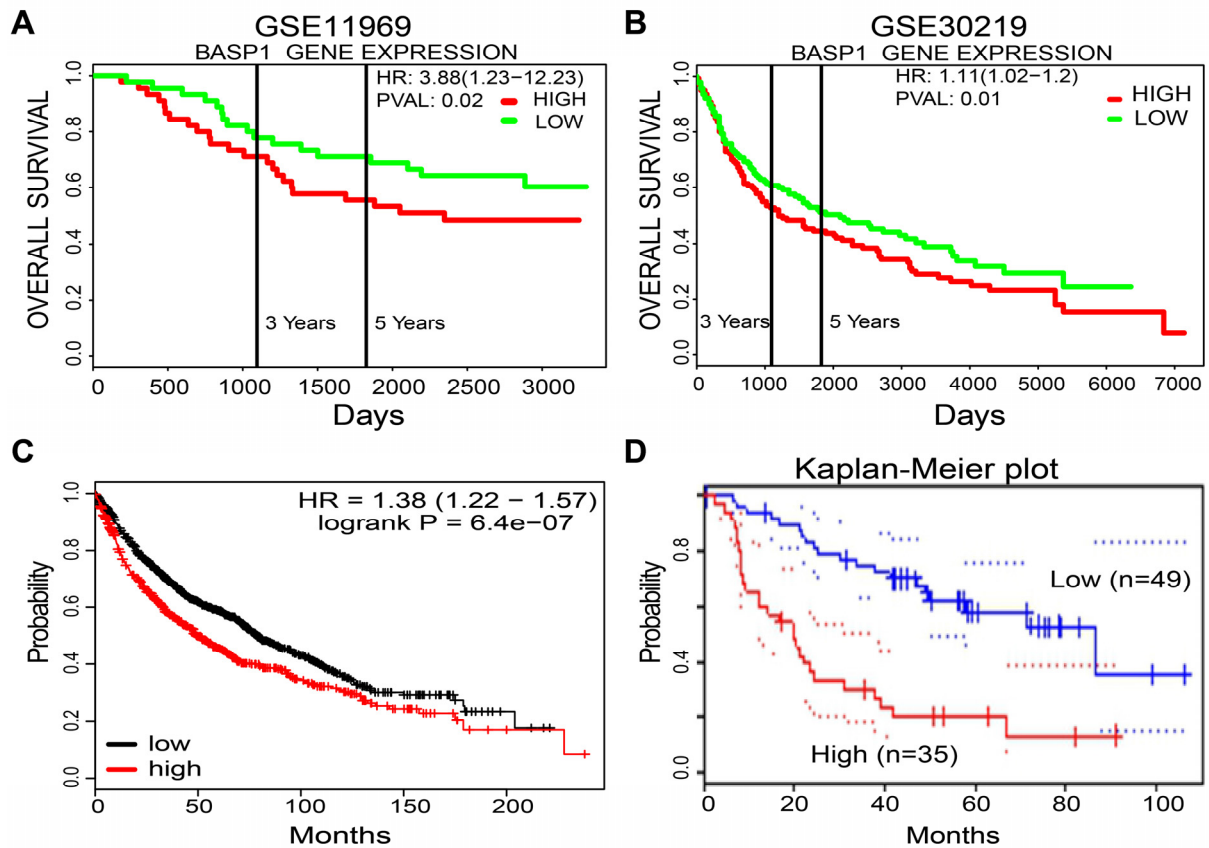

**Figure S1**, related to Figure 1. **(A-D)** Kaplan-Meier survival curves stratified by BASP1 expression from human lung cancer patient cohorts from GSE11969 (A), GSE30219 (B), Kaplan-Meier Plotter (C), and PrognScan (D). The median of BASP1 expression was used as cutoff for low and high expression.

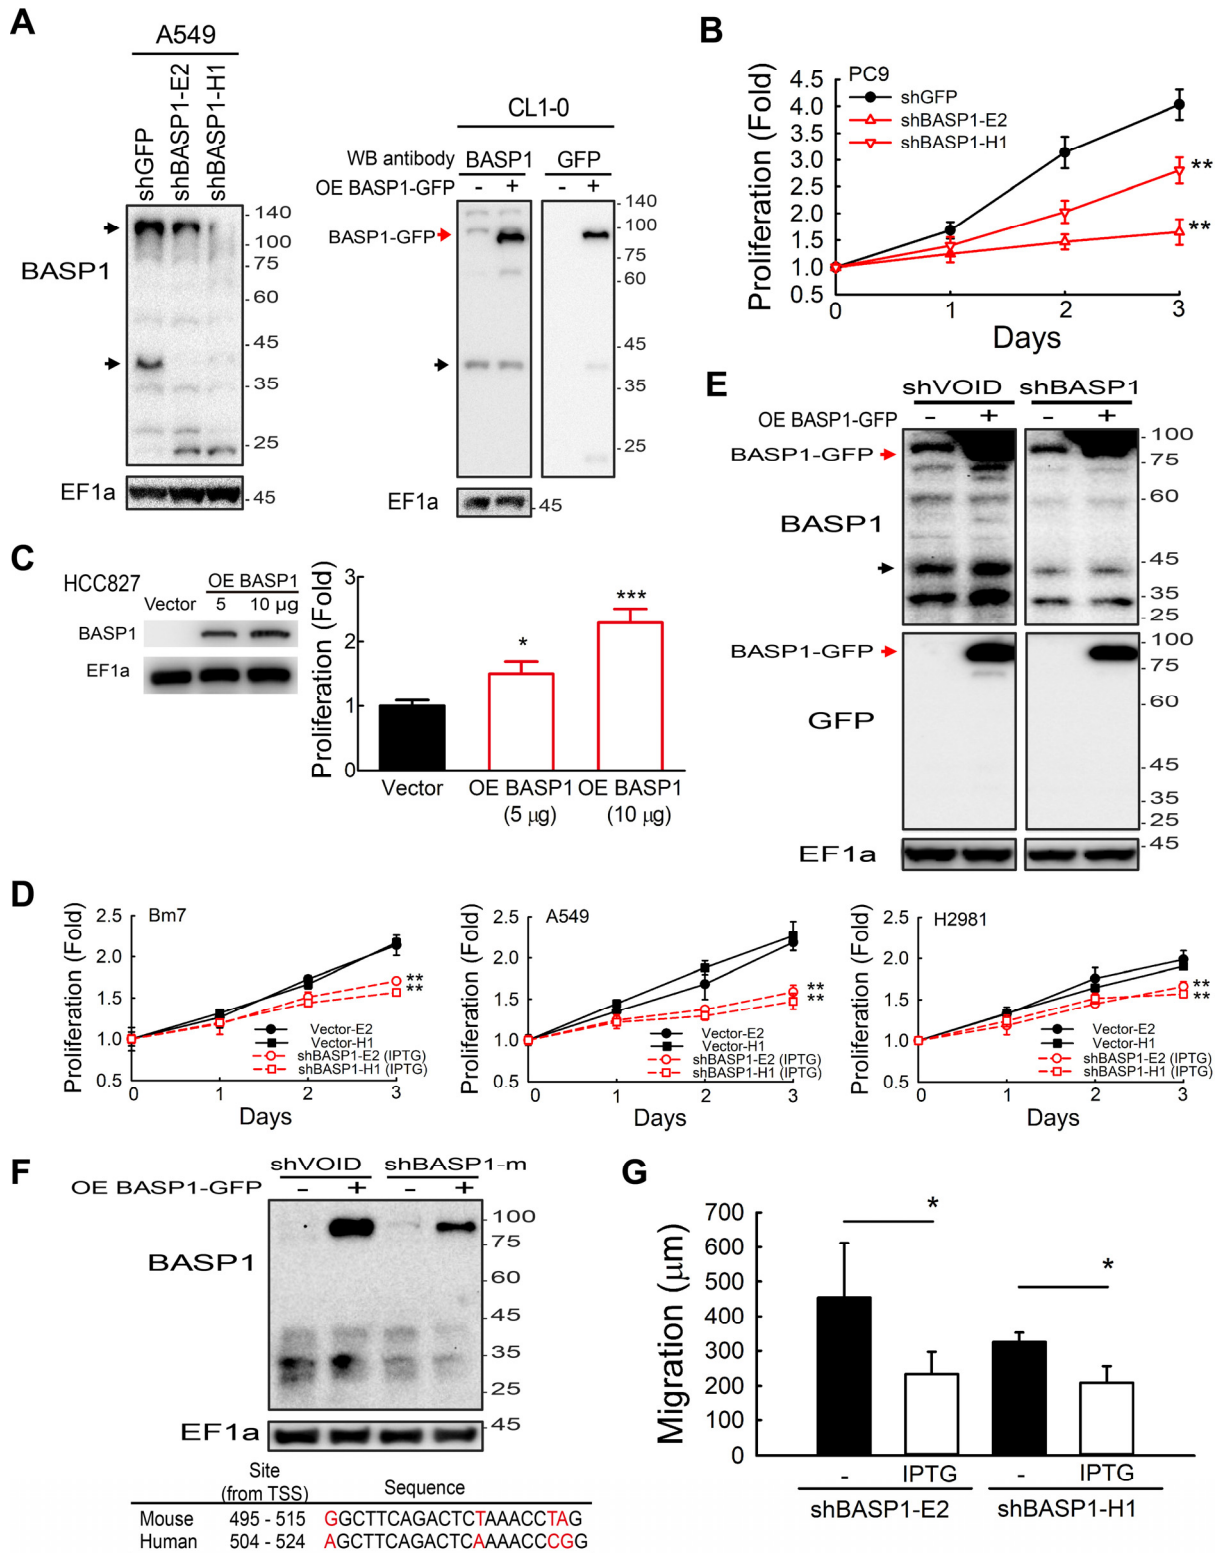

**Figure S2**, related to Figure 2. *BASP1*-knockdown influences cell proliferation and migration in lung cancer cells. **(A)** Western blot analysis of *BASP1* in *BASP1*-knockdown A549 lung cancer cells (left). Endogenous *BASP1* proteins and ectopic *BASP1*-GFP fusion proteins in CL1-0 cancer cells with overexpression (OE) of

BASP1-GFP fusion proteins were detected by BASP1 or GFP antibodies. Black arrow, endogenous BASP1; red arrow, BASP1-GFP. **(B)** The relative proliferation rate of control (shGFP) and *BASP1*-knockdown cells (shBASP1-E2 and shBASP1-H1) in PC9 cells by MTT assay. **(C)** Analysis of cell growth of HCC827 cells transfected with plasmids of BASP1 (OE BASP1) or vector alone. The amount of transfected plasmids is shown above the blots. **(D)** Cell proliferation of Bm7, A549, and H2981 in IPTG-induced BASP1 knockdown by MTT assays. **(E)** Western blot of BASP1 in control and *BASP1*-knockdown CL1-0 cells with overexpression of BASP1-GFP. **(F)** Western blot of control and *BASP1*-knockdown (shBASP1-mA) TC1 mouse lung cancer cells with OE of BASP1-GFP. The sequence of human BASP1 from BASP1-GFP plasmid and mouse BASP1 that was targeted by shRNA (shBASP1-m) was shown (bottom). The four different nucleotide sequences between human and mouse BASP1 genes are marked in red. **(G)** The 16-h migration distance of control and IPTG-inducible BASP1-knockdown Bm7 cells was measured by time-lapse video microscopy. At least 30 cells per experiment were recorded. Data represent mean  $\pm$ SEM. A two-tailed Student's *t*-test was performed to compare control and treatment groups. \**P* < 0.05.

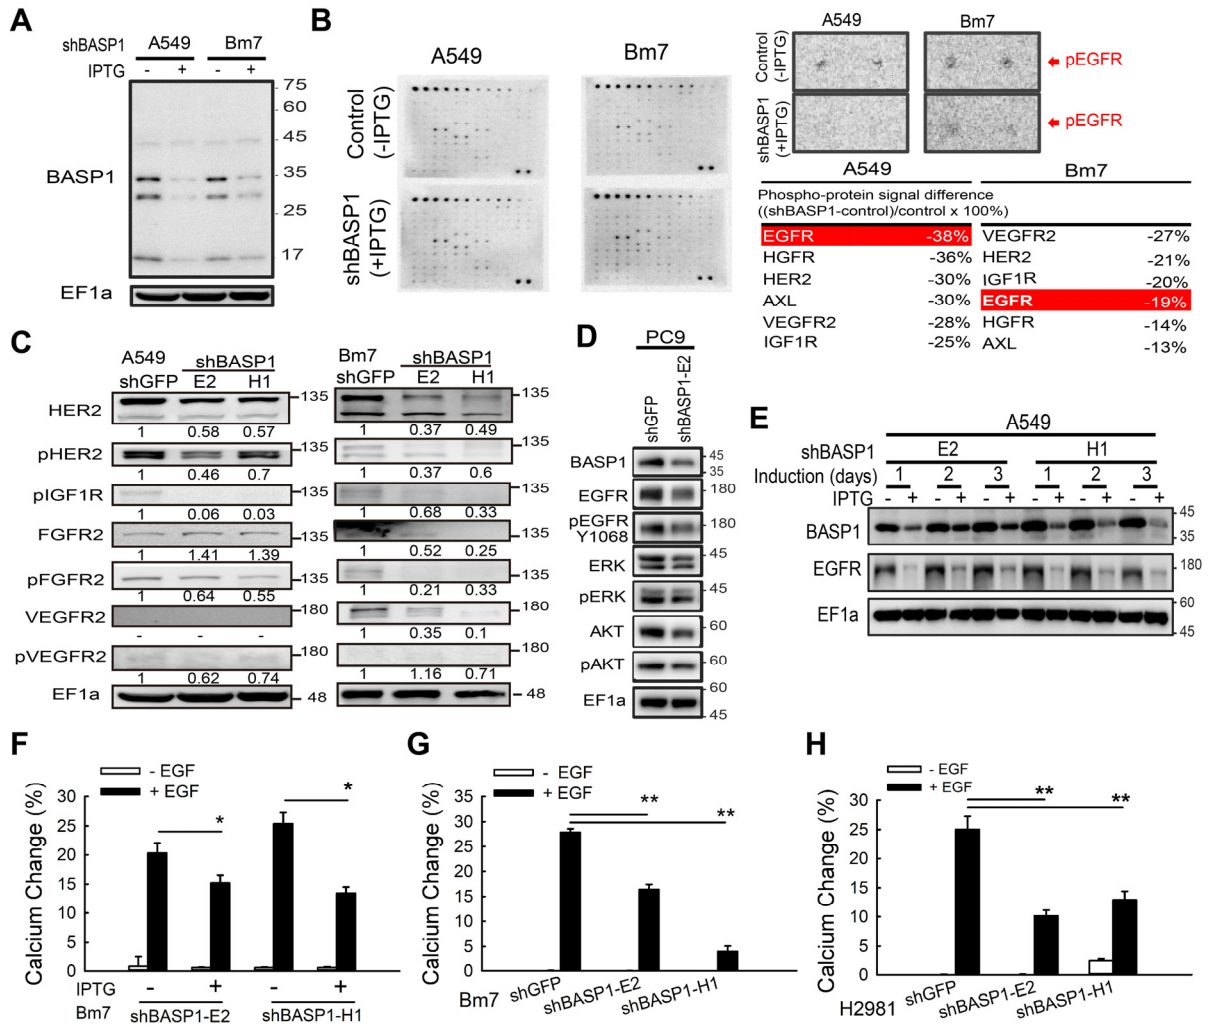

**Figure S3**, related to Figure 3. BASP1 increases EGFR protein expression in lung cancer cells. **(A)** Western blot of BASP1 in control and *BASP1*-knockdown lung cancer cells with IPTG-inducible shBASP1. **(B)** Cell lysates from control and *BASP1* knockdown cells with IPTG-inducible shBASP1 were hybridized with human phospho-receptor tyrosine kinase (RTK) protein array. The differences in phospho-protein levels between control (-IPTG) and *BASP1* knockdown (+IPTG) cells are shown on the right. **(C)** Western blot analysis of RTK and phospho-RTK in stable control and *BASP1*-knockdown A549 and Bm7 cells with the indicated antibodies. **(D)** Western blot of EGFR signaling pathways in PC9 lung cancer cells with IPTG inducible shBASP1 expression. **(E)** Western blot analysis of BASP1 in A549 lung cancer cells with IPTG-inducible shBASP1 at different days of IPTG induction with the indicated antibodies. **(F)** Intracellular calcium concentrations of control and IPTG-inducible *BASP1*-knockdown Bm7 lung cancer cells. Cells were serum starved for 4 hours and then treated with 50 ng/mL of EGF. **(G and H)** Intracellular calcium concentrations of stable control and *BASP1*-knockdown Bm7 (G) and H2981 (H)

lung cancer cells. All cells were serum starved for 16 hours followed by EGF (50 ng/mL) treatment.



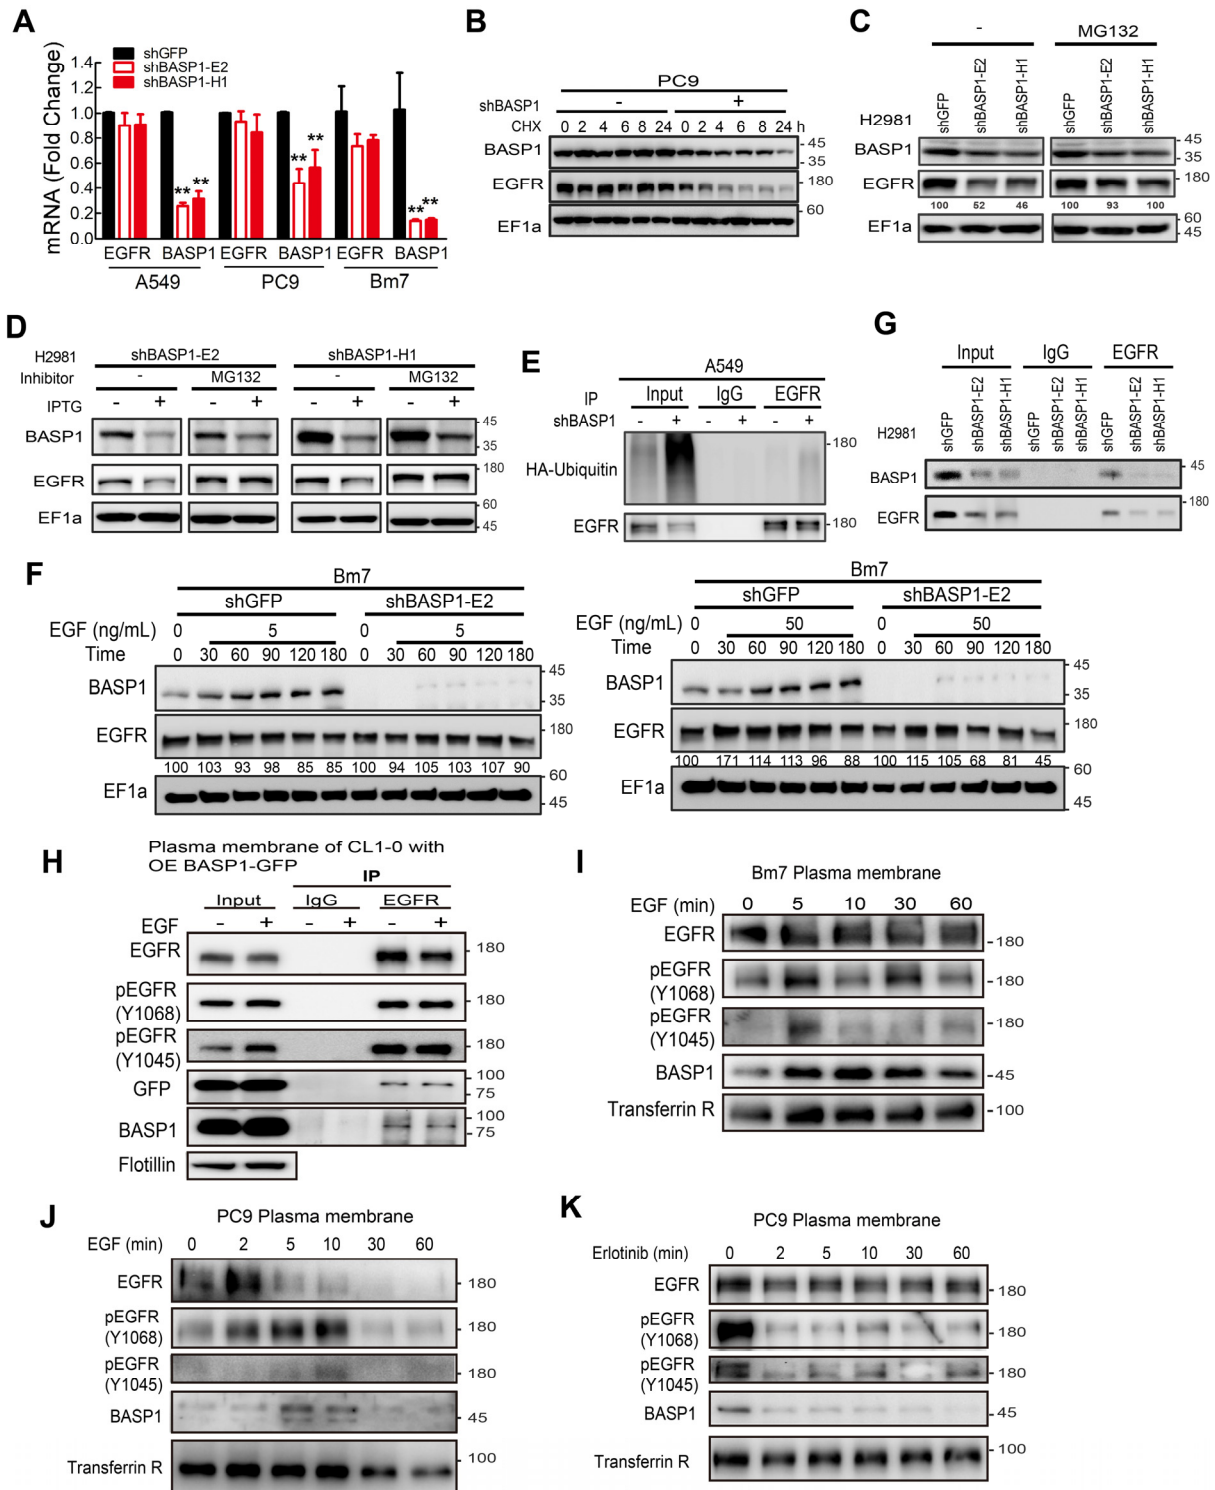

**Figure S4**, related to Figure 4 and Figure 5.

**(A)** Quantitative RT-PCR analysis of EGFR and BASP1 mRNA levels in control and *BASP1*-knockdown of A549, PC9, and Bm7 lung cancer cells. Data represent mean  $\pm$  SD ( $n = 3$ ). **(B)** Western blot analysis of BASP1 and EGFR in control and *BASP1*-knockdown PC9 lung cancer cells treated with CHX for indicated time periods. **(C)**

Western blot analysis of Control and *BASP1*-knockdown H2981 lung cancer cells cultured in starvation for 16 hours and then treated with EGF for 2 hours before collecting cell lysates. Cells were treated with 5  $\mu$ M proteasome inhibitor MG132 for 3 hours before EGF stimulation. **(D)** Western blot of IPTG-induced *BASP1*-knockdown H2981 lung cancer cells cultured in starvation for 16 hours and then treated with EGF (50 ng/mL) for 2 hours before collecting cell lysate. Cells were treated with proteasome inhibitor MG132 (5  $\mu$ M) for 3 hours before EGF stimulation. **(E)** IPTG-induced sh*BASP1* of A549 cells with HA-ubiquitin overexpression followed by MG132 and EGF treatment for 2 hours. EGFR was immunoprecipitated from cell extracts using an EGFR antibody. **(F)** Western blot analysis of EGFR of control and *BASP1*-knockdown Bm7 cells treated with low dose of EGF (5 ng/mL) or high dose of EGF (50 ng/mL) at indicated time points. **(G)** Coimmunoprecipitation of *BASP1* and EGFR in H2981 lung cancer cells. EGFR was immunoprecipitated from the lysates followed by immunoblotting with the indicated antibodies. **(H)** Coimmunoprecipitation of EGFR and *BASP1* from plasma membrane fraction of CL1-0 cells transiently transfected with *BASP1*-GFP. **(I and J)** Western blot analysis of plasma membrane fraction of Bm7 cells (I) and PC9 (J) treated with EGF (50 ng/mL) at indicated time points. **(K)** Western blot analysis of plasma membrane fraction of PC9 cells treated with Erlotinib (100 nM) and subsequently adding EGF for 5 min.

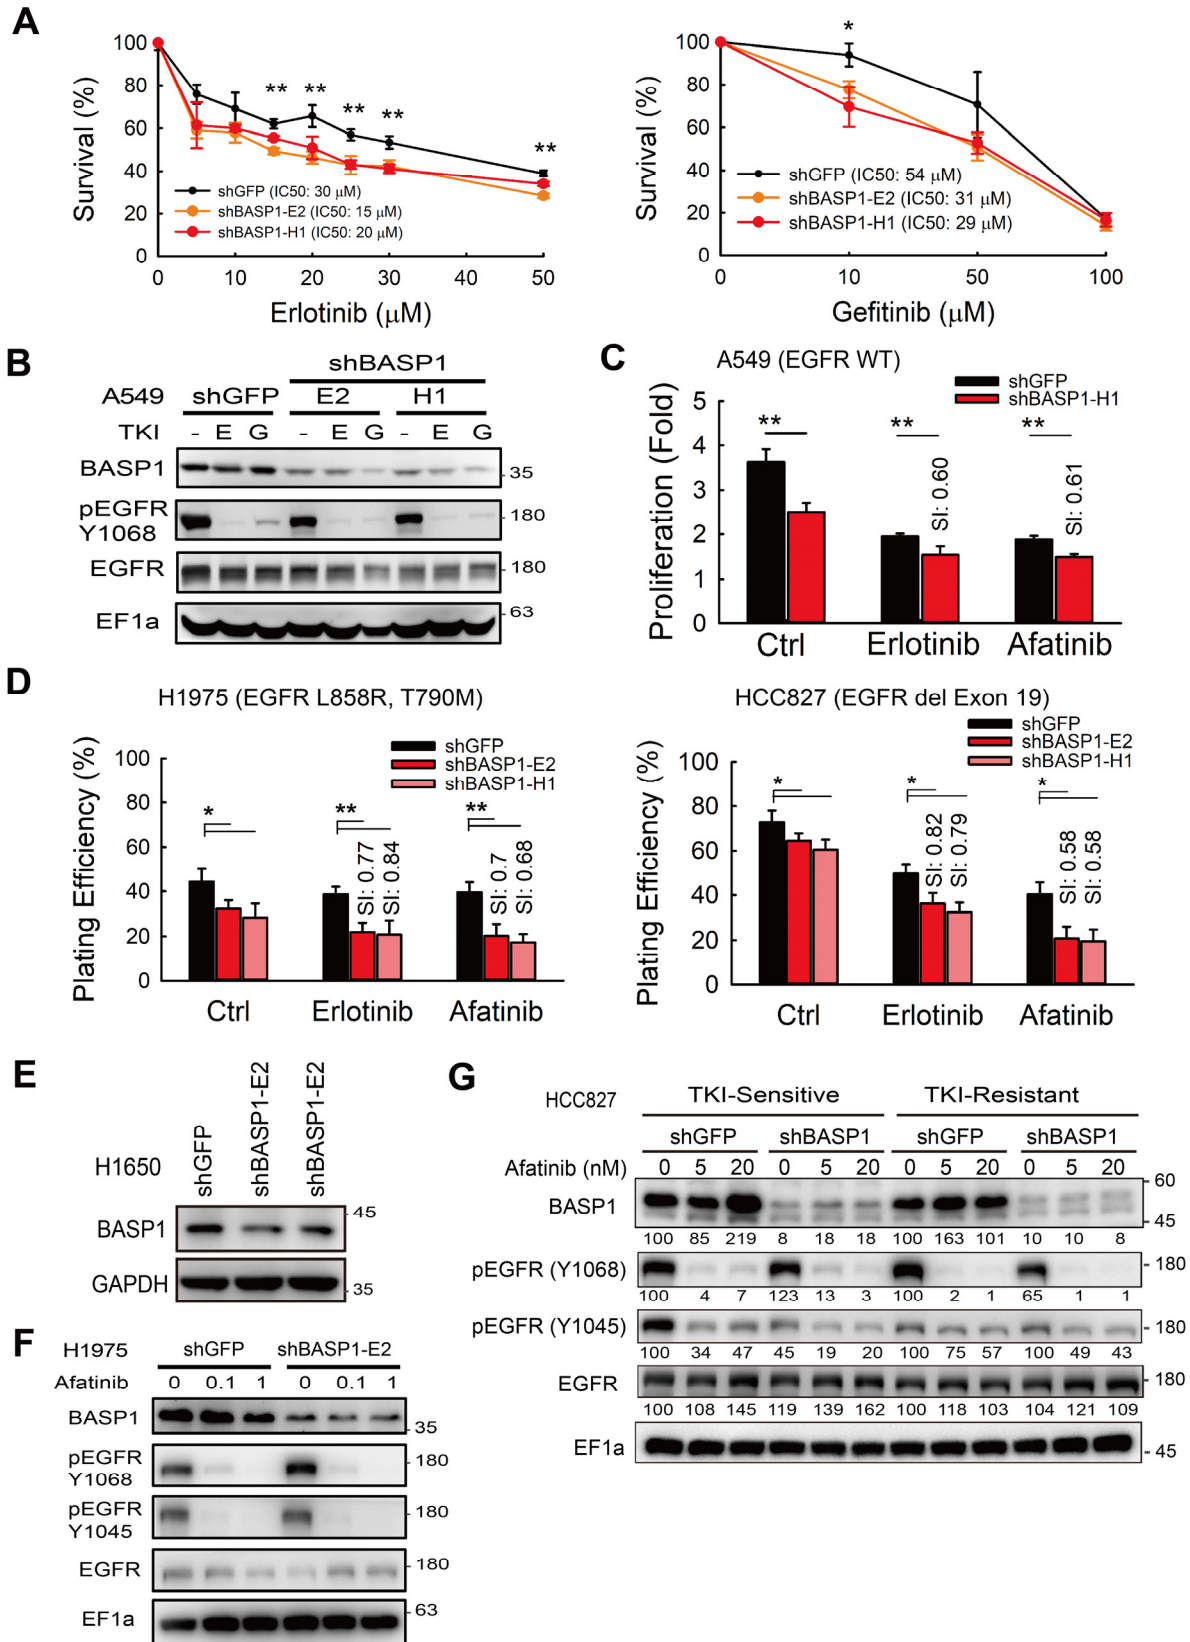

Figure S5, related to Figure 6.

**(A)** Cell proliferation of A549 cells treated with erlotinib and gefitinib for 2 days by MTT assay. **(B)** Western blot analysis of BASP1 and EGFR in control and *BASP1*-knockdown A549 lung cancer cells treated with erlotinib and gefitinib. E: erlotinib; G: gefitinib. **(C)** Comparison of cell proliferation of control or *BASP1*-knockdown of A549 treated with EGFR targeting agents, erlotinib and afatinib, by MTT assay. Erlotinib, 15  $\mu$ M. Afatinib, 1  $\mu$ M. **(D)** Plating efficiency of stable control and *BASP1*-knockdown H1975 and HCC827 lung cancer cells treated with EGFR TKIs by colony formation assay. Erlotinib (5  $\mu$ M) and afatinib (0.1  $\mu$ M) in H1975. Erlotinib (100 nM) and Afatinib (2.5 nM) in HCC827. **(E)** Western blot analysis of BASP1 in H1650 lung cancer cells. **(F)** Western blot analysis of BASP1 and EGFR in control and *BASP1*-knockdown H1975 lung cancer cells treated with afatinib. **(G)** TKI-Sensitive and TKI-Resistant HCC827 lung cancer cells were treated with afatinib for 1 h followed by EGF for 20 min. EGF, 50 ng/mL.

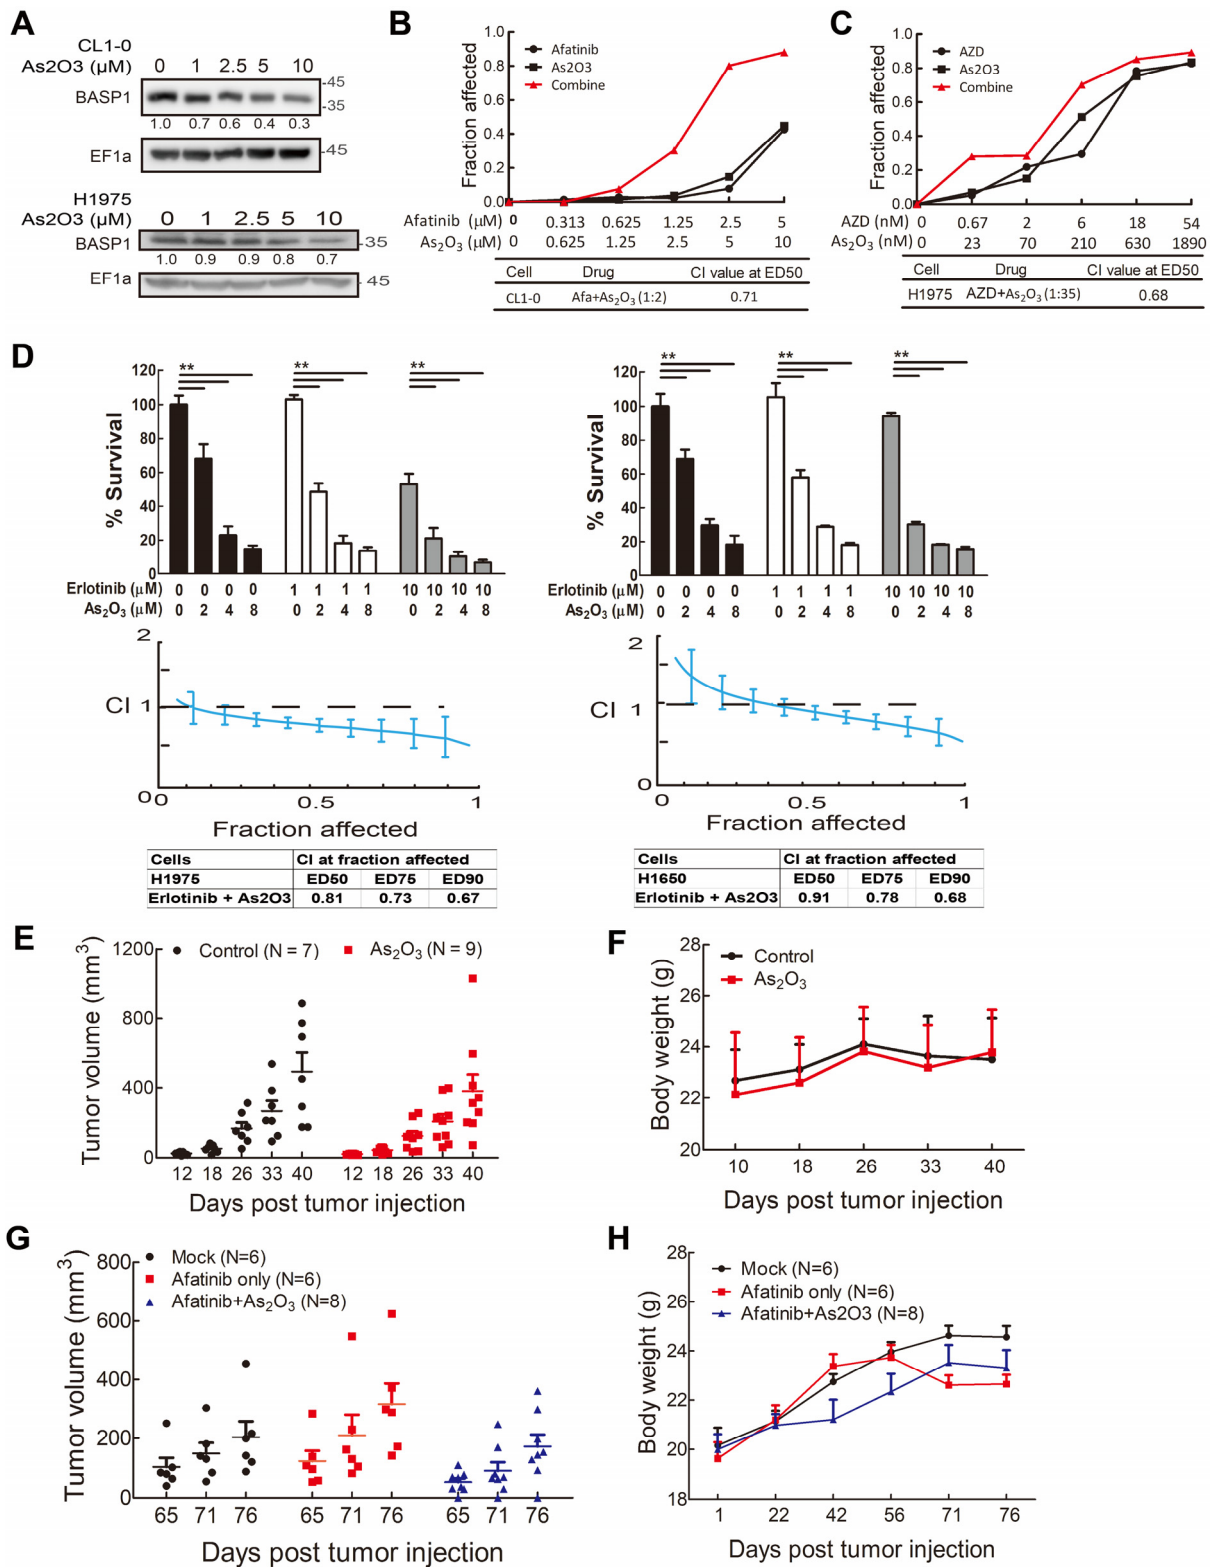

**Figure S6**, related to Figure 6.

(A) Western blot analysis of BASP1 in CL1-0, and H1975 lung cancer cells treated with arsenic trioxide. (B) Synergistic therapeutic effects of As<sub>2</sub>O<sub>3</sub> and afatinib in CL1-0 cells by MTT assay. Combination index (CI) analysis (bottom). (C) Synergistic

therapeutic effects of As<sub>2</sub>O<sub>3</sub> and AZD9291 in H1975 by colony formation assay. **(D)** H1975 and H1650 cells treated with As<sub>2</sub>O<sub>3</sub> and erlotinib were subjected to MTT assay (top) and combination index (CI) curve analysis (bottom). CI < 1 indicates synergistic effect. **(E)** Tumor volume of SCID mice bearing subcutaneous H1975 lung cancer cells treated with As<sub>2</sub>O<sub>3</sub>. **(F)** Mouse body weight of SCID mice bearing subcutaneous H1975 lung cancer cells treated with As<sub>2</sub>O<sub>3</sub>. **(G)** Measured tumor volume from SCID mice bearing subcutaneous H1975 lung cancer cells treated with afatinib and As<sub>2</sub>O<sub>3</sub>. **(H)** Mouse body weight assessment from SCID mice bearing subcutaneous H1975 lung cancer cells treated with afatinib and As<sub>2</sub>O<sub>3</sub>.
